# Supplementary material for: Nature of Long-Lived Moiré Interlayer Excitons in Electrically Tunable MoS2/MoSe2 Heterobilayers
Source: PubMed Central journal article supplement (PMC11403766; doi:10.1021/acs.nanolett.4c02635), 2024-08-30
Supplement: nl4c02635_si_001.pdf [file nl4c02635_si_001.pdf]

# Supplementary Information for Nature of long-lived moiré interlayer excitons in electrically tunable MoS<sub>2</sub>/MoSe<sub>2</sub> heterobilayers

Evgeny M. Alexeev,<sup>\*,†,‡</sup> Carola M. Purser,<sup>‡,†</sup> Carmem M. Gilardoni,<sup>‡</sup> James Kerfoot,<sup>†</sup> Hao Chen,<sup>†</sup> Alisson R. Cadore,<sup>†,¶</sup> Bárbara L.T. Rosa,<sup>†</sup> Matthew S. G. Feuer,<sup>‡</sup> Evans Javary,<sup>‡,§</sup> Patrick Hays,<sup>||</sup> Kenji Watanabe,<sup>⊥</sup> Takashi Taniguchi,<sup>#</sup> Seth Ariel Tongay,<sup>||</sup> Dhiren M. Kara,<sup>‡</sup> Mete Atatüre,<sup>\*,‡</sup> and Andrea C. Ferrari<sup>\*,†</sup>

<sup>†</sup>*Cambridge Graphene Centre, University of Cambridge, 9 JJ Thomson Avenue, CB3 0FA, Cambridge, UK*

<sup>‡</sup>*Cavendish Laboratory, University of Cambridge, JJ Thomson Avenue, Cambridge CB3 0HE, UK*

<sup>¶</sup>*Brazilian Nanotechnology National Laboratory, Brazilian Center for Research in Energy and Materials, Sao Paulo, 13083-100, Brazil*

<sup>§</sup>*École Normale Supérieure, PSL, 5 Rue D'ulm Paris, 75005, France*

<sup>||</sup>*Materials Science and Engineering, School for Engineering of Matter, Transport and Energy, Arizona State University, Tempe, Arizona 85287, United States*

<sup>⊥</sup>*Research Center for Electronic and Optical Materials, National Institute for Materials Science, 1-1 Namiki, Tsukuba 305-0044, Japan*

<sup>#</sup>*Research Center for Materials Nanoarchitectonics, National Institute for Materials Science, 1-1 Namiki, Tsukuba 305-0044, Japan*

E-mail: ea529@cam.ac.uk; ma424@cam.ac.uk; acf26@cam.ac.uk

Table 1: **Devices parameters.** Summary of key parameters for the devices investigated in this study: twist angle ( $\theta$ ), fast and slow time constant for iX PL decay ( $\tau_1$  and  $\tau_2$ ), effective iX g-factor ( $g$ ), optically-induced valley polarization in the absence of magnetic field and at saturation ( $\rho_{\text{PL}}^0$  and  $\rho_{\text{PL}}^{\text{sat.}}$ ), and saturation magnetic field for  $\rho_{\text{PL}}$  ( $B_{\text{sat.}}$ ).

| Device # | $\theta, ^\circ$ | $\tau_1, \mu\text{s}$ | $\tau_2, \mu\text{s}$ | $g$  | $\rho_{\text{PL}}^0$ | $\rho_{\text{PL}}^{\text{sat.}}$ | $B_{\text{sat.}}, T$ |
|----------|------------------|-----------------------|-----------------------|------|----------------------|----------------------------------|----------------------|
| 1        | 4                | 0.03                  | 0.13                  | +6.0 | -0.07                | -0.13                            | 3                    |
| 2        | 1                | 1.0                   | 4.4                   | +6.7 | -0.04                | -0.11                            | 1.25                 |
| 3        | 3                | 0.14                  | 0.56                  | +2.5 | -0.01                | -0.07                            | 0.02                 |
| 4        | 1                | 0.33                  | 2.2                   | +2.7 | -0.03                | -0.10                            | $\leq 0.25$          |
| 5        | 3                | 0.3                   | 1.7                   | +1.0 | -0.01                | -0.09                            | $\leq 1$             |
| 6        | 1                | 0.8                   | 3.0                   | +8.0 | 0.0                  | -0.06                            | 0.2                  |
| 7        | 28               | n.a.                  | n.a.                  | n.a. | n.a.                 | n.a.                             | n.a.                 |
| 8        | 27               | n.a.                  | n.a.                  | n.a. | n.a.                 | n.a.                             | n.a.                 |

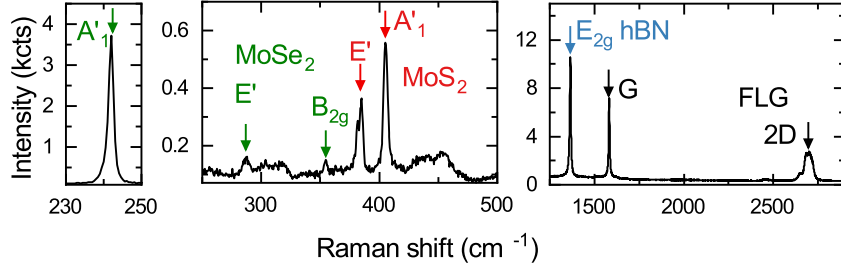

Figure S1: **Raman spectroscopy.** Raman spectra from the device, acquired at room temperature using 2.33 eV optical excitation. Dominant peaks in the 50-500  $\text{cm}^{-1}$  range correspond to in-plane  $A'_1$  mode at 241.9 (405.4)  $\text{cm}^{-1}$  and out-of-plane  $E'$  mode at 286.7 (384.0)  $\text{cm}^{-1}$  of MoSe<sub>2</sub> (MoS<sub>2</sub>).<sup>1</sup> The peak at 354.7  $\text{cm}^{-1}$  is out-of-plane  $B_{2g}$  mode of MoSe<sub>2</sub>, which is Raman inactive on monolayers,<sup>2</sup> but becomes active in few-layers and heterobilayers due to the reduction of symmetry elements.<sup>3</sup> Higher-frequency range shows  $E_{2g}$  mode at from hBN encapsulation layers at 1365  $\text{cm}^{-1}$ <sup>4</sup> and the  $G$  and  $2D$  Raman modes from FLG gates, at 1582 and  $\sim 2697$   $\text{cm}^{-1}$ ,<sup>5</sup> respectively.

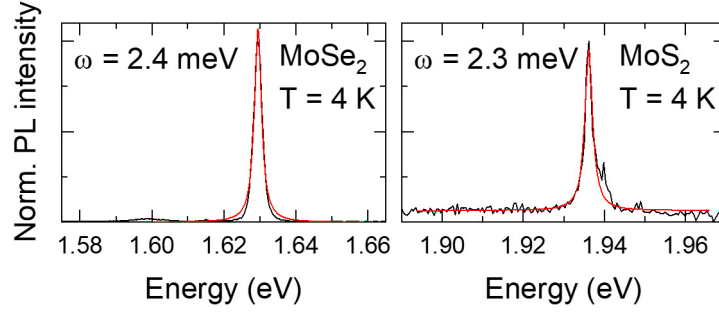

Figure S2: **Photoluminescence spectroscopy of constituent monolayers.** PL spectra recorded in (left) MoSe<sub>2</sub> and (right) MoS<sub>2</sub> monolayer regions at 4 K. The neutral exciton peak linewidth approaches the homogeneous limit, confirming the high optical quality.

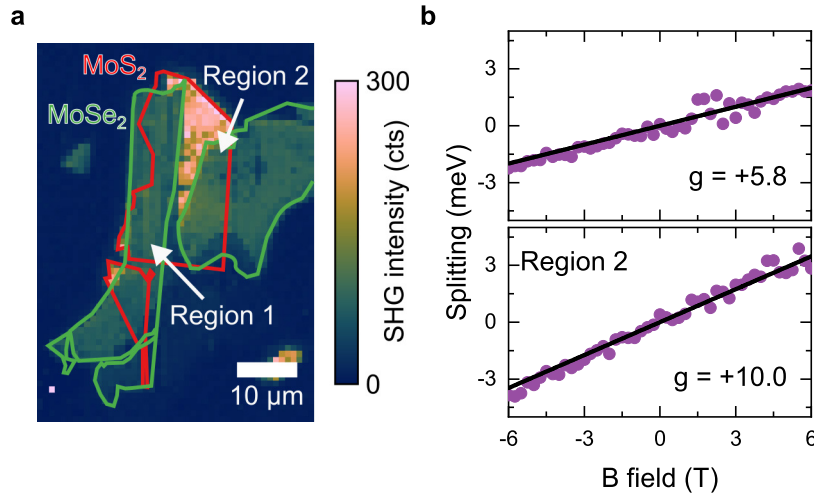

Figure S3: **Stacking configuration identification.** (a) Map of SHG intensity recorded in Device 6 at room temperature using 1320 nm excitation, containing heterobilayer Regions 1 and 2 with the opposite stacking created using tear-and-stack method. Both regions demonstrate similar SHG intensity, preventing reliable identification of stacking configuration. (b) Energy splitting between  $\sigma+$  and  $\sigma-$  polarized PL as a function of out-of-plane magnetic field for heterobilayer Regions 1 and 2.

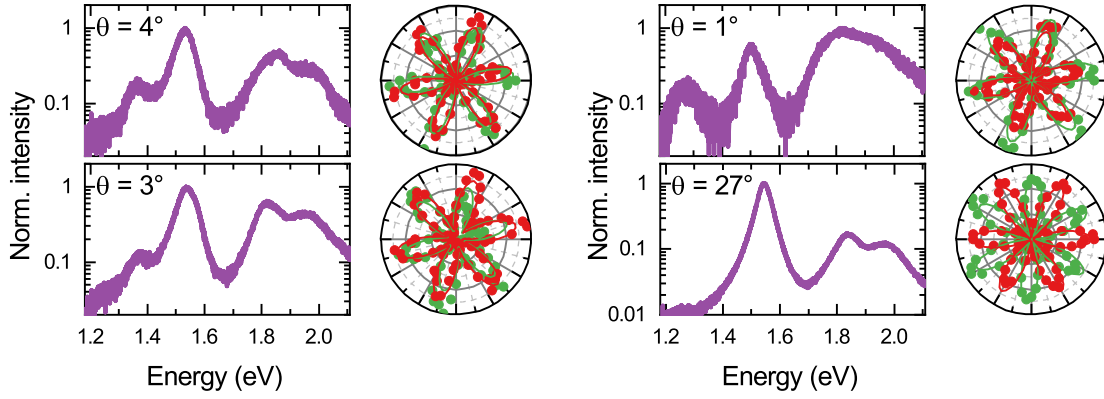

Figure S4: **Twist angle effects.** Normalized PL spectra and polar plots of polarization-resolved SHG signals acquired at room temperature in four devices with different rotational alignment between the TMD layers. Three devices with close rotational alignment ( $\theta \leq 5^\circ$ ) show iX peak in the PL spectrum, which is not present in the PL spectrum of the strongly misaligned device ( $\theta \approx 27^\circ$ ).

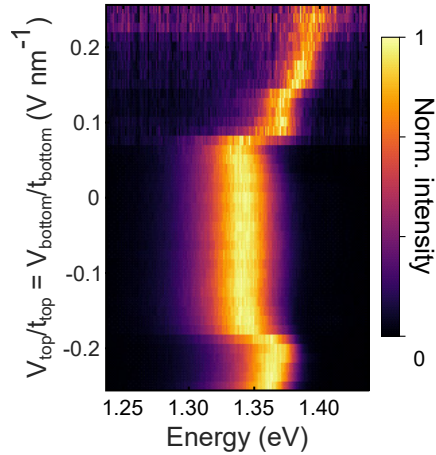

Figure S5: **Doping dependence of iX emission.** Normalized PL spectrum as a function of electrostatic doping of the TMD heterostructure, with  $V_{\text{top}}/t_{\text{top}} = V_{\text{bottom}}/t_{\text{bottom}}$ . Here,  $V_{\text{top}}$  ( $V_{\text{bottom}}$ ) is the gate bias applied between the top (bottom) graphene electrode and the heterostructure, and  $t_{\text{top}}$  ( $t_{\text{bottom}}$ ) is the thickness of the top (bottom) hBN dielectric.

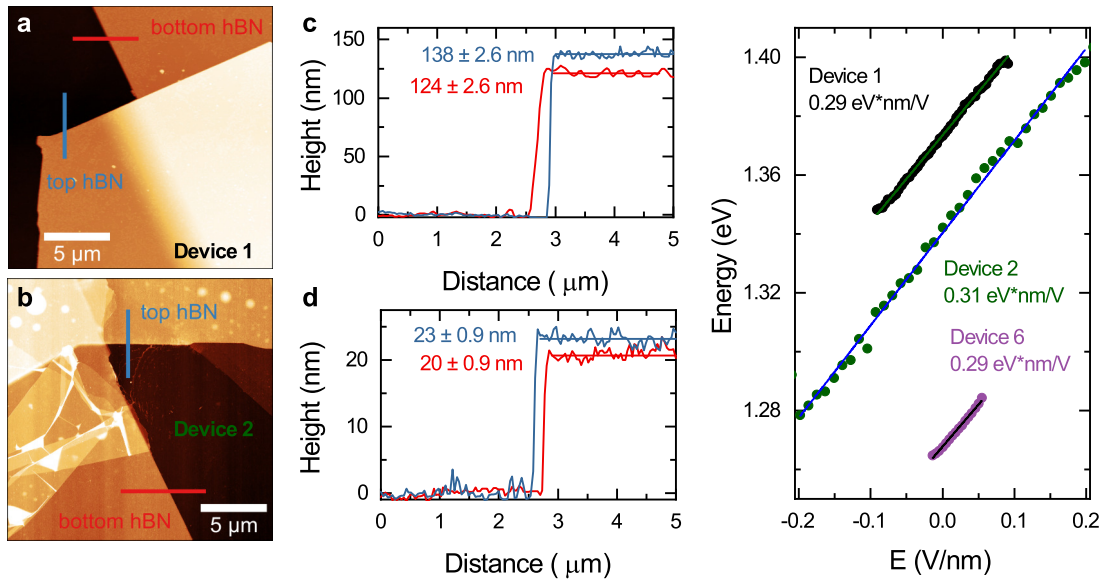

Figure S6: **Dipole size identification.** (a-c) (a and b) AFM topography images of devices 1 and 2 acquired at the edges of top and bottom hBN encapsulation layers and (c and d) cross-sections taken at the positions identified by the corresponding colour lines, showing the thickness of the layers. (e) Change of  $iX$  emission energy under applied out-of-plane electric field measured in Devices 1,2, and 6. The rate of change of  $\sim 0.3$  eV V/nm extracted from the linear fit corresponds to the dipole size of  $\sim 0.55$  nm.

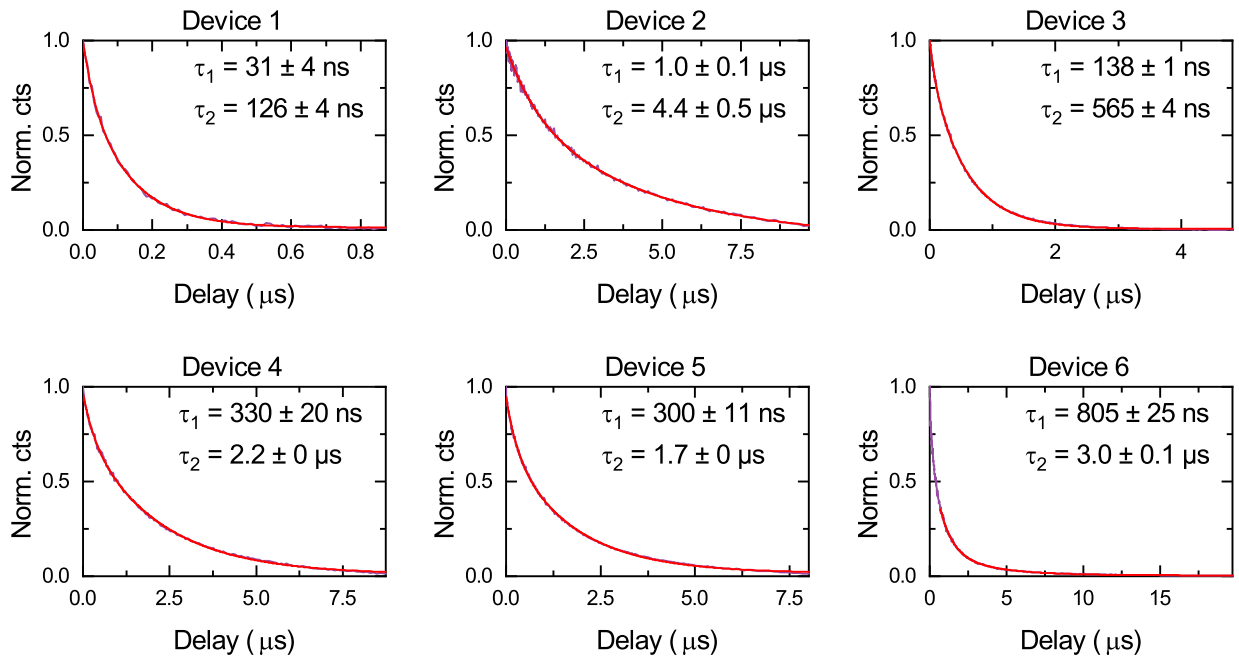

Figure S7: **iX lifetimes.** iX PL decay acquired in Devices 1-6. Solid red lines are bi-exponential fits to the data, time constants extracted from the fit are presented next to each curve.

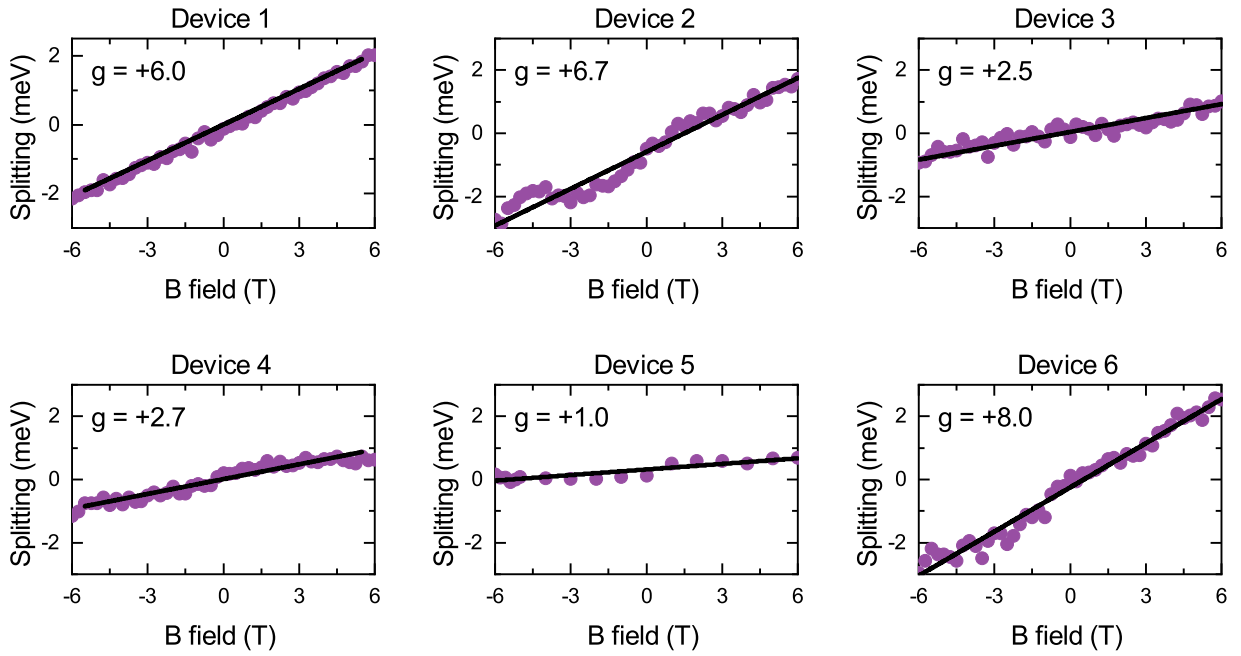

Figure S8: **iX effective g-factors.** Energy splitting between  $\sigma^+$  and  $\sigma^-$  polarized PL as a function of out-of-plane magnetic field for Devices 1-6. Landé g factors extracted using linear fitting are listed next to each plot.



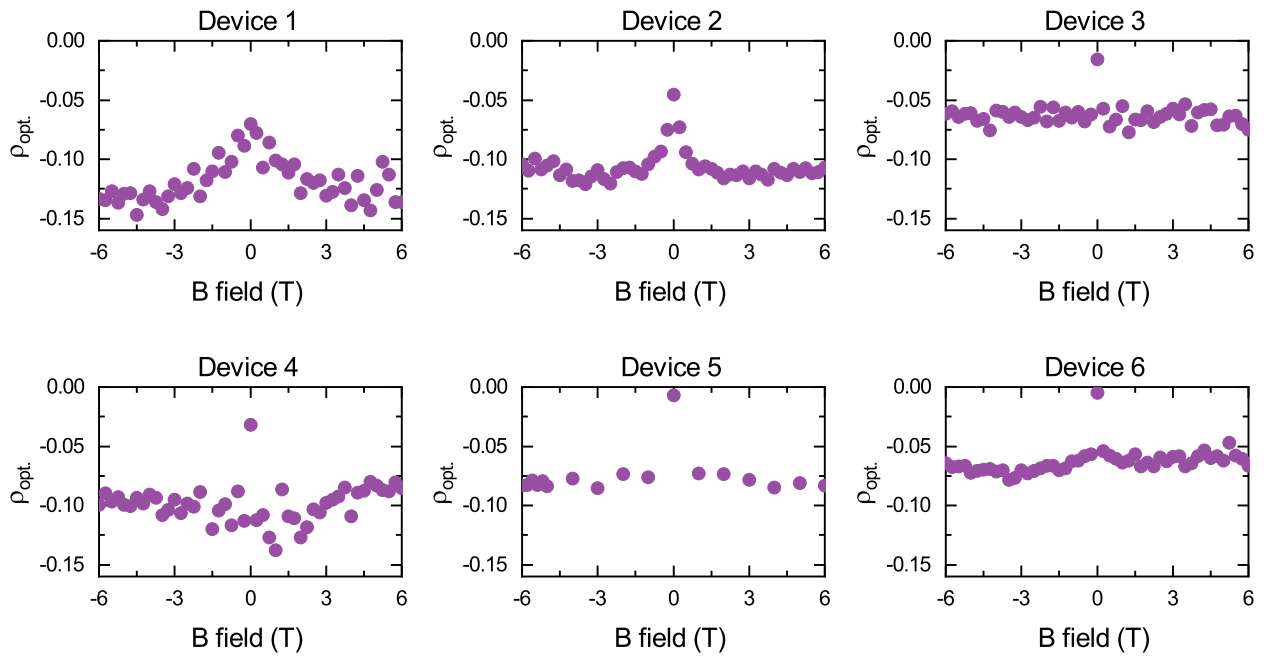

Figure S9: **Optically induced valley polarization.** Changes of optically induced iX PL valley polarization under applied magnetic field for Devices 1-6.

## References

- (1) Terrones, H.; Del Corro, E.; Feng, S.; Poumirol, J. M.; Rhodes, D.; Smirnov, D.; Pradhan, N. R.; Lin, Z.; Nguyen, M. A.; Elías, A. L.; Mallouk, T. E.; Balicas, L.; Pimenta, M. A.; Terrones, M. New First Order Raman-Active Modes in Few Layered Transition Metal Dichalcogenides. *Sci. Rep.* **2014**, *4*, 1–9.
- (2) Tonndorf, P.; Schmidt, R.; Böttger, P.; Zhang, X.; Börner, J.; Liebig, A.; Albrecht, M.; Kloc, C.; Gordan, O.; Zahn, D. R. T.; Michaelis de Vasconcellos, S.; Bratschitsch, R. Photoluminescence Emission and Raman Response of Monolayer MoS<sub>2</sub>, MoSe<sub>2</sub>, and WSe<sub>2</sub>. *Opt. Express* **2013**, *21*, 4908.
- (3) Pan, Y.; Li, S.; Rahaman, M.; Milekhin, I.; Zahn, D. R. T. Signature of Lattice Dynamics in Twisted 2D Homo/hetero-Bilayers. *2D Mater.* **2022**, *9*, 045018.
- (4) Reich, S.; Ferrari, A. C.; Arenal, R.; Loiseau, A.; Bello, I.; Robertson, J. Resonant Raman Scattering in Cubic and Hexagonal Boron Nitride. *Phys. Rev. B - Condens. Matter Mater. Phys.* **2005**, *71*, 1–12.
- (5) Ferrari, A. C.; Meyer, J. C.; Scardaci, V.; Casiraghi, C.; Lazzeri, M.; Mauri, F.; Piscanec, S.; Jiang, D.; Novoselov, K. S.; Roth, S.; Geim, A. K. Raman Spectrum of Graphene and Graphene Layers. *Phys. Rev. Lett.* **2006**, *97*, 1–4.
